# Supplementary material
Source: publisher figshare collection journal article supplement (https://brill.figshare.com/ndownloader/files/28368729)
Supplement: Supplementary file 1 [file 28368729]

# **Metacognition and Crossmodal Correspondences Between Auditory Attributes and Saltiness in a Large Sample Study**

**Qian Janice Wang**<sup>1,\*,\*\*</sup>, **Steve Keller**<sup>2,\*\*\*</sup> and **Charles Spence**<sup>3,\*\*\*\*</sup>

<sup>1</sup> Department of Food Science, Aarhus University, 5792 Aarhus, Denmark

<sup>2</sup> Studio Resonate at SXM Media, Oakland, USA

<sup>3</sup> Crossmodal Research Laboratory, Department of Experimental Psychology, Anna Watts Building, University of Oxford, Oxford, OX2 6GG, UK

Received 16 April 2021; accepted 1 June 2021

\* To whom correspondence should be addressed. E-mail: [qianjanice.wang@food.au.dk](mailto:qianjanice.wang@food.au.dk)

\*\* ORCID: 0000-0001-7054-2137

\*\*\* ORCID: 0000-0001-6181-4831

\*\*\*\* ORCID: 0000-0003-2111-072X

**Supplementary Material**

**Table S1.** Results of participants' soundtrack–saltiness matches, for all 13 auditory parameters. The chart reveals the distribution of participants' choice of soundtrack that best evoked saltiness for each auditory parameter, with a total of 1,819 responses for each parameter. All parameters have non-random distributions of answers, according to a  $\chi^2$  of goodness of fit and corrected by Bonferroni correction ( $\alpha = 0.0038$ ). Within each parameter, the choice with most votes is shown in bold. All parameters with three choices are shown first, sorted by decreasing order of  $\chi^2$  values, followed by those parameters with two choices.

|                            |                         |          |                        | $\chi^2$ | df | <i>p</i> |
|----------------------------|-------------------------|----------|------------------------|----------|----|----------|
| <b>Decay</b>               | Shortest                | Middle   | Longest                |          |    |          |
|                            | 437                     | 430      | 952                    | 295.63   | 2  | < 0.001  |
| <b>Roughness</b>           | Least rough             | Middle   | Most rough             |          |    |          |
|                            | 526                     | 429      | 864                    | 172.01   | 2  | < 0.001  |
| <b>Randomness</b>          | Least random rhythm     | Middle   | Most random rhythm     |          |    |          |
|                            | 842                     | 552      | 425                    | 150.79   | 2  | < 0.001  |
| <b>Articulation</b>        | Legato                  | Middle   | Staccato               |          |    |          |
|                            | 562                     | 450      | 807                    | 109.96   | 2  | < 0.001  |
| <b>Consonance</b>          | Consonant               | Middle   | Dissonant              |          |    |          |
|                            | 630                     | 419      | 770                    | 102.98   | 2  | < 0.001  |
| <b>Attack</b>              | Shortest                | Middle   | Longest                |          |    |          |
|                            | 652                     | 416      | 751                    | 97.70    | 2  | < 0.001  |
| <b>Tempo</b>               | Slowest tempo           | Middle   | Fastest tempo          |          |    |          |
|                            | 450                     | 625      | 744                    | 72.14    | 2  | < 0.001  |
| <b>Reverberation</b>       | Least reverberation     | Middle   | Most reverberation     |          |    |          |
|                            | 493                     | 617      | 709                    | 38.76    | 2  | < 0.001  |
| <b>Harmonic complexity</b> | Least complex           | Middle   | Most complex           |          |    |          |
|                            | 523                     | 571      | 725                    | 36.74    | 2  | < 0.001  |
| <b>Syncopation</b>         | Least syncopated rhythm | Middle   | Most syncopated rhythm |          |    |          |
|                            | 639                     | 510      | 670                    | 23.75    | 2  | < 0.001  |
| <b>Valence</b>             | Positive                | Negative |                        |          |    |          |
|                            | 540                     | 1,279    |                        | 300.23   | 1  | < 0.001  |
| <b>Arousal</b>             | High                    | Low      |                        |          |    |          |
|                            | 1,193                   | 626      |                        | 176.74   | 1  | < 0.001  |
| <b>Mode</b>                | Major                   | Minor    |                        |          |    |          |
|                            | 667                     | 1,152    |                        | 129.32   | 1  | < 0.001  |
